# Supplementary material for: Technical note: A global database of the stable isotopic ratios of meteoric and terrestrial waters
Source: Copernicus journal article supplement (doi:10.5194/hess-2019-173), 2019-04-26
Supplement: Supplementary file 1 [file hess-2019-173-supplement.zip]

# Supplemental Material for ‘Technical note: A global database of the stable isotopic ratios of meteoric and terrestrial waters’

Annie L. Putman<sup>1,2</sup> and Gabriel J. Bowen<sup>1,2</sup>

<sup>1</sup>University of Utah Geology & Geophysics, University of Utah, 383 F.A. Sutton Bldg. 115 S. 1460 E., Salt Lake City, UT 84112-0102, US

<sup>2</sup>Global Change & Sustainability Center, University of Utah, 234 F.A. Sutton Bldg. 115 S. 1460 E., Salt Lake City, UT 84112-0102, US

**Correspondence:** Annie Putman (putmanannie@gmail.com)

1. Data upload template
2. Database records

## 1 Data upload template

The template for data organization for upload to the database, named WI\_template.xlsx, is included as a separate file.

## 5 2 Database records for individual projects

All projects associated with the database (as of April 2019) are described in the following sections. Projects in each subsection are organized by Project ID. The project subsections were selected to highlight the wide variety of sources of data, including network-based datasets, agency supported data collection efforts, published, and unpublished work. Individual projects may fall under multiple categories, and are presented here with the category we judged to be most characteristic. Each entry includes a short description of relevant sampling design information, *Project\_ID* and the data citation(s). All datasets are available from the wiDB unless otherwise noted. If projects are not redistributable, we comment on where data may be accessed.

### 2.1 Network datasets

**Antarctic Surface Snow Database:** An assimilated database of *Snow\_pit*, *Ice\_core*, *Firn\_core* and *Precipitation* samples representing sampling from 1954 to 2001. Samples often integrate multiple year timescales. Project 00001, (Masson-Delmotte et al., 2008) and references therein.

**Global Network of Isotopes in Precipitation:** Monthly *Precipitation* samples collected by the IAEA at long term monitoring sites around the world, starting from 1960 and continuing through present. These data are unavailable for download from the wiDB, but are available from the Water Isotope System for Data Analysis, Visualization and Electronic Retrieval (WISER). Project 00020, (IAEA/WMO, 2019).

**iUtah water survey:** Collection of *Tap, Sprinkler, Spring, Ground, Canal, Lake, Mine, River\_or\_stream* from across Utah, US. Data collection efforts focus in the Salt Lake Valley of UT and sampling spans 2013 to 2016. Project 00033, (Jameel).

**Tibetan Network of Isotopes in Precipitation:** *Precipitation* collected at 18 stations across the Tibetan Plateau between 1991 and 2008. Project 00074, (Yao et al., 2013).

- 5 **US Network of Isotopes in Precipitation:** Isotope analyses for biweekly *Precipitation* samples collected at 76 sites across the United States from 1989 to 1996 as part of the National Atmospheric Deposition Program. These data are unavailable for download from the wiDB, but may be available directly from the data contributor upon request. Project 00076, (Welker, 2000).

- NASA global seawater database:** An assimilated database of *Ocean* samples from 1949 to 2009. Samples may be at surface or at depth and represent a single point in time. These data are not available from the wiDB, but are publicly available through the project website. Project 00106, (Schmidt et al., 1999).

**Southern African water isotopes:** Collection of *Precipitation* samples from countries in Southern Africa between 1967 and 2008. This dataset is assimilated from a number of networks and publications. These data are not available for download through the wiDB, but can be accessed from the original data sources. Projects 00134 - 00139, (Vogel and van Urk, 1975; Beekman and amd K.J. de Vries, 1998; E., 2000; Meyer, 2001; Harris et al., 2010; Abiye, 2013).

- 15 **JAMSTEC isotope sampling:** Monthly scale *Precipitation* and *River\_or\_stream* samples from across southeast Asia and Siberia. Sampling occurred between 2001 and 2012. These data are not available from the wiDB, but are available through the JAMSTEC website. Event scale precipitation data are available from the data contributors upon request. Project 00167, (Kurita and Ichiyanagi, 2008).

- Tibetan Plateau river waters:** Collection of *River\_or\_stream, Snow\_pit, Spring, Lake, Precipitation* from the Tibetan Plateau and surrounding regions. Samples were collected between 1998 and 2013. Data were assimilated for a meta-analysis (Li and Garziona, 2017). We accessed data from original sources when possible. Projects 00170-00179, (Ding et al., 2009; Hren et al., 2009; Bai et al., 2012; Bershaw et al., 2012; Hoke et al., 2014; Liu, 2014; Xu et al., 2014; Liu et al., 2015; Li and Garziona, 2017).

## 2.2 Agency data

### 25 2.2.1 EPA

**National Lakes Assessment:** *Lake* samples collected across the US during 2007 as part of National Lakes and Ponds Assessment. Project 00011, (Brooks et al., 2014).

**Willamette River Basin:** *River\_or\_stream* samples from Willamette River Basin in western Oregon, US. Samples were collected between 2008 and 2010. Project 00011, (Brooks et al., 2012).

- 30 **Oregon Precipitation:** Ongoing collection of *Precipitation* samples from Oregon, US collected between 2002 and 2015. Project 00016, (Brooks, 2017a).

**National Rivers and Streams Assessments:** *River\_or\_stream* samples from 2007-2008 and 2013-2014 as part of National River and Streams Assessment. Over 2000 sites were sampled during each campaign. The 2007-2008 data are available for

download from the wiDB, and 2013-2014 data will be available upon publication of the EPA NRSA report. Projects 00165 and 00140, (Brooks, 2009, 2014).

**Pipestem Creek Prairie Pothole:** Collection of *Ground, Lake, Precipitation, River\_or\_stream* samples for a wetland connectivity study. Samples were collected between 2014 and 2015. Project 00155, (Brooks et al., 2018).

### 5 2.2.2 USGS

**AIRMoN:** Collection of 7 *Precipitation* samples at 7 sites across eastern US, integrating 1992 to 1994. Project 00005, (Coplen and Huang, 2000).

**NASQAN/HBN:** *River\_or\_stream* at 391 sites across the US between 2002 and 2015. Project 00048, (Deacon and Woodside, 2015).

10 **USA Tapwater:** *Tap* water samples from 349 sites across the US collected between 2007 and 2008. Project 00090, (Coplen et al.).

**Hawaii Groundwater:** *Ground* and *Precipitation* samples from Hawaii, US collected between 1992 and 1994. Project 00111, (Scholl et al., 1996).

15 **Puerto Rico Hydrology:** Collection of *Precipitation, River\_or\_stream, Ground* and *Cloud\_or\_fog* samples from across Puerto Rico collected between 1994 and 2013. Project 00129, (Scholl et al., 2014).

**Yellowstone National Park LMWL:** *Precipitation* and *Snow\_pit* data from Yellowstone National Park region, US collected between 1999 and 2001 to establish a local meteoric water line for the region. Project 00190, (Benjamin et al., 2005).

**US Water Quality Field/Lab Samples:** *Ground* and *Spring* waters from across the United States, spanning 1900 through 2018. Project 00210, (Survey, 2019).

### 20 2.2.3 Other Agencies

**Critical Zone Observatory, US:** *River\_or\_stream* samples collected at the Shale Hills Observatory between 2009 and 2011. Project 00130, (Duffy, 2011).

**Ontario Geological Survey, CA:** *Ground* water measurements from Ontario, CA in 2014. Project 00113, (Hamilton, 2015).

25 **DIHA-PUC surface waters, CL:** *Ground, Precipitation, River\_or\_stream, Lake, Canal,* and *Spring* water collected from Salar de Huasco, CL between 1991 and 2015. Projects 00191, 00192, 00193, 00194, (Salazar et al., 1998; DIH, 2009; Uribe et al., 2015; Sanchez-Murillo et al., 2017).

**MAF Biosecurity and Department of Conservation, NZ:** Monthly scale *Precipitation* collections from 2007 through 2010. Project 00204, (Frew, 2015).

30 **Idaho Groundwater quality:** *Ground* and *Spring* samples from across Idaho, US, spanning 1997 through 2016. Project 00206, (IDG).

## 2.3 Published data

### 2.3.1 Precipitation

**Project 00006:** A single sample spanning 1995 through 1998 at St. Louis, MO, US (Criss, 1999).

**Project 00013:** Five samples from 1989 collected in southern California, US, collected in 1989 (Friedman et al., 1992).

5 **Project 00014:** 278 samples from the western US collected between 1991 and 1994 (Friedman et al., 2002a, b).

**Project 00017:** 44 samples from Butte, MT, US, collected in 2004 (Gammons et al., 2006).

**Project 00022:** 94 samples from Nebraska, US collected between 1989 and 1994 (Harvey and Welker, 2000).

**Project 00023, 00024:** 90 samples from Mead, NE, US collected between 1992 and 1999 (Harvey, 2001).

**Project 00025:** 104 samples from Pawnee National Grasslands, CO, US between 1994 and 1998 (Harvey, 2005).

10 **Project 00027:** 178 monthly scale samples collected at 4 sites near Sydney, AU between 2005 and 2009 (Hughes and Crawford, 2013).

**Project 00029:** One sample collected from Nevada, US in 1986 (Ingraham et al., 1991).

**Project 00030:** Over 100 samples collected from 2 sites in Iowa, US collected between 2001 and 2002 (Iqbal, 2008).

**Project 00031:** 98 Samples collected between 1992 and 2002 at Ames, IA, US (Simpkins, 1995; Iqbal, 2008).

15 **Project 00036:** A single sample at a single site that integrates *Precipitation* between 1985 and 1987 in Wisconsin, US (Krabbenhoft et al., 1990).

**Project 00037:** 243 samples collected at 5 sites in Russia between 1996 and 2000 (Kurita et al., 2004).

**Project 00039:** 72 samples collected at 72 sites across Italy collected between 1996 and 2002 (Longinelli and Selmo, 2003).

20 **Project 00041:** 48 event-scale samples at one site in Kalamazoo, MI, US collected between 1993 and 1994 (Machavaram and Krishnamurthy, 1995).

**Project 00049:** Single sample collected integrating 1985 through 1985 at Lubbock, TX, US (Nativ and Riggio, 1990).

**Project 00052:** 120 monthly samples from Calgary, AB, CA collected between 1992 and 2001 (Peng et al., 2004).

**Project 00051:** 20 samples at 4 sites in Nevada, US collected between 2013 and 2014 (Oerter et al., 2017).

**Project 00053:** 532 samples at 20 sites in Taiwan, CN collected between 1993 and 2008 (Peng et al., 2010).

25 **Project 00055:** 279 samples at 5 sites in Florida, US collected between 1997 and 2006 (Price et al., 2008).

**Project 00057:** 48 event scale 2 sites in Washington State, US collected between 2000 and 2001 (Robertson and Gazis, 2006).

**Project 00060:** 713 samples at 126 sites on the East Coast of US who recieved precipitation from Superstorm Sandy in 2012. Samples are sub-daily resolution, and come from a network of contributors (Good et al., 2014).

30 **Project 00062:** One sample from Ames, IA that integrates all of 1992 (Simpkins, 1995).

**Project 00080:** 18 samples from a single site in Taipai, Taiwan, CN collected between 1997 and 1998 (Wang and Peng, 2001).

**Project 00084:** 842 monthly samples from 16 sites in the mountainous region surrounding Nagano, JP collected between 2010 and 2015 (Yamanaka et al., 2015).

- Project 00085:** A single sample integrating the calendar year of 1982 at Albuquerque, NM, US (Yapp, 1985).
- Project 00086:** 72 monthly scale samples collected at 6 sites across Mongolia collected between 2002 and 2003 (Yamanaka et al., 2007).
- Project 00096:** 318 event-scale samples at a single site in Guangzhou, CN collected between 2007 and 2009 (Xie et al., 2011).
- Project 00100:** 58 event-scale samples at 3 sites in Riyadh, SA collected between 1974 and 2013 (historical data and recent collection) (Michelsen et al., 2015).
- Project 00101:** 31 event-scale samples at one site in Bangalore, IN in 2010 (Rahul et al., 2016).
- Project 00128:** 91 event-scale samples at one site in Utqiagvik, AK, US between 2009 and 2013 (Putman et al., 2017).
- Project 00132:** 925 samples at 1 site in California, US collected between 2008 and 2014 (Oshun et al., 2016).
- Project 00143:** 32 samples integrating multiple months from 8 sites across Hawaii, US between 2013 and 2014 (Fackrell, 2016).
- Project 00151:** 2302 samples, including *Cloud\_or\_fog*, from 9 sites on Mt. Kilimanjaro, TZ collected between 2012 and 2014 (Otte et al., 2017).
- Project 00153:** 330 event-scale samples from 9 sites in the Galapagos, EC collected between 2012 and 2016 (Martin et al., 2018).
- Project 00156:** 204 event-scale samples from 2 sites in the Alxa Desert Plateau, CN collected between 2013 and 2017 (Rao et al., 2018).
- Project 00159:** 140 event-scale samples from one site at Mossel Bay, ZA collected between 2009 and 2012 (Braun et al., 2017).
- Project 00160:** 49 event-scale samples at one site in Mossel Bay, ZA collected between 2006 and 2007 (Bar-Matthews et al., 2010).
- Project 00161:** 1030 event-scale samples at 1 site in Gunning Mulu National Park, MY collected between 2006 and 2011 (Moerman et al., 2013).
- Project 00168:** 25 event-scale samples at 2 sites in southern Australia collected between 2009 and 2011 (Guan et al., 2013).
- Project 00185:** 233 monthly-scale samples including 10 *Lake* samples from 15 sites in central-eastern Africa collected between 2013 and 2015 (Balagizi et al., 2018).
- Project 00187:** 325 event-scale samples, including 181 *Cave\_drip* samples from 2 sites in the Iberian Peninsula collected between 2010 and 2012 (Moreno et al., 2014).
- Project 00188:** 184 paired *Precipitation* and *Vapor* samples at one site in Heidelberg, DE collected between 1981 and 1988 (Jacob and Sonntag, 1991).
- Project 00203:** 178 samples, including 73 *River\_or\_stream* samples from 82 sites in the Andes Mountains collected between 2002 and 2010 (Hoke et al., 2013).
- Project 00158:** 173 samples at one site in the Yamdruk-tso catchment, Southern Tibetan Plateau collected between 2004 and 2007 (Tian et al., 2008).

**Project 00207:** 446 samples from one site in central Indiana, US collected between 2014 and 2018 (Tian and Wang, 2019).

**Project 00209:** 1343 event-scale samples from one site at Summit, GR, collected between 2011 and 2014 Kopeck et al. (2019).

### 2.3.2 Surface waters

5 **Project 00012:** 250 *River\_or\_stream* samples from Bolivia collected between 2009 and 2012 (Fiorella et al., 2015).

**Project 00019:** 358 *Lake* and *River\_or\_stream* samples from 205 sites from various depths near river outlets in eastern Lake Michigan, US collected between 2012 and 2014 (Jameel et al., 2018b).

**Project 00034:** 514 *Lake* samples from 80 sites and various depths in Laurentian Great Lakes, US, collected in 2007 (Jasechko et al., 2014).

10 **Project 00073:** 24 *River\_or\_stream* samples at 24 sites in Big Cottonwood Canyon, UT, US, collected in 2011 (Tipple, 2015).

**Project 00092:** 366 *Lake, River\_or\_stream, Ground, Precipitation, Spring* and *Tap* samples from 266 sites across Ethiopia and Kenya collected between 1975 and 2007 (Levin et al., 2009).

**Project 00093:** 208 *Lake* samples at 184 sites in Alaska, US collected between 2007 and 2011 (Anderson et al., 2013).

15 **Project 00103:** 350 *Lake* and *River\_or\_stream* samples from 139 sites from Ethiopia collected between 1976 and 2005, (Kebede et al., 2009).

**Project 00107:** 185 *Lake* samples from 184 sites in Northern Canada collected in 1993 (Gibson and Edwards, 2002).

**Project 00112:** 76 *Lake* samples from 58 sites in western China collected between 2010 and 2012 (Wen et al., 2016).

**Project 00115:** 28 *River\_or\_stream* samples from one site in Fairbanks, AK, US collected between 2005 and 2006 (Douglas  
20 et al., 2013).

**Project 00117:** 75 samples at 25 sites along the Jordan River, UT, US, collected in 2016 (Follstad Shah et al., 2019).

**Project 00119:** 404 *River\_or\_stream* samples from 357 sites from across Alaska, US and Yukon, CA collected between 2005 and 2006 (Lachniet et al., 2016).

**Project 00120:** 71 *River\_or\_stream* and *Tap* samples from 71 sites around Patagonia, AR and CL, collected in 2005 (Smith  
25 and Evans, 2007).

**Project 00121:** 76 *River\_or\_stream, Lake* and *Canal* samples from 75 sites across CO, northeast of Bogota, collected between 2008 and 2009 (Saylor et al., 2009).

**Project 00122:** 1179 *River\_or\_stream, Precipitation* and *Snow\_pit* samples from 169 sites in and near the Togiak National Wildlife Refuge, AK, US collected between 2011 and 2013 (Lisi et al., 2015).

30 **Project 00123:** 1714 *River\_or\_stream* and *Ground* samples from 199 sites from Canada and northern United States collected between 1963 and 2011 (Jasechko et al., 2017).

**Project 00124:** 237 *River\_or\_stream* from 236 sites in northwest Argentina collected between 2010 and 2013, (Rohrmann et al., 2014).

**Project 00125:** 257 *River\_or\_stream* and *Lake* samples from 257 sites in Peru and Bolivia collected between 2007 and 2014 (Bershaw et al., 2012).

**Project 00126:** 8 *River\_or\_stream* samples at 8 sites in Huaraz, PE, collected in 2005 (Giovanni et al., 2010).

**Project 00127:** 124 *Lake* samples from 116 sites across the western United States collected between 2006 and 2008 (Henderson and Shuman, 2009).

**Project 00142:** 54 *River\_or\_stream*, *Lake* and *Ground* samples from 54 sites in Ecuador collected between 2014 and 2017 (Florea et al., 2017).

**Project 00145:** 158 *Lake* samples from 63 sites in the Peace-Athabasca Delta lakes region, Northern Alberta, CA collected between 2000 and 2006. Note that sample sites were not provided so site geographic information was estimated using the sites map and Google Earth (Yi et al., 2008).

**Project 00157:** 307 *Lake* and *Precipitation* samples from 2 sites near Cona Lake, CN collected between 2011 and 2013 (Cui et al., 2017).

**Project 00180:** 150 *River\_or\_stream*, *Lake*, *Spring*, *Ground*, *Precipitation*, and *Snow\_pit* samples from 106 sites along transects from California into Nevada and Oregon, US collected between 1979 and 1985 (Ingraham and Taylor, 1991).

**Project 00181:** 116 *River\_or\_stream*, *Lake*, *Spring*, *Ground*, and *Precipitation* samples at 103 sites from Patagonia, AR and CL collected between 1998 and 2011 (Stern and Blisniuk, 2002).

**Project 00182:** 97 *River\_or\_stream*, *Spring*, and *Snow\_pit* samples from 97 sites in California, US collected between 2008 through 2009 (Niemi and Lechler, 2012).

**Project 00189:** 110 *Lake* samples at 41 sites near Kangerlussuaq, GR, collected during summers between 2009 and 2013 (Kopec et al., 2018).

**Project 00197:** 19 *River\_or\_stream* samples from 10 sites along the Sava River, SI, HR and RS collected between 2014 and 2015 (Ogrinc et al., 2018).

**Project 00205:** 283 *River\_or\_stream* samples from 219 sites in Wyoming and Nebraska, US collected between 2011 and 2016 (Zhu et al., 2018).

### 2.3.3 Ground waters

**Project 00043:** 234 *Ground* water samples from 234 sites across Mexico, collected in 2007 (Wassenaar et al., 2009).

**Project 00045:** 106 *Ground* water samples from 106 sites across western Michigan, US collected between 2008 and 2009 (Bowen et al., 2012).

**Project 00063:** 677 *Ground* and *Tap* waters from 675 sites across South Africa collected between 2006 and 2010 (West et al., 2014).

**Project 00108:** 48 *Ground* water samples from 40 sites across the Great Plains states, US collected between 1984 and 1992 (Dutton, 1995).

**Project 00110:** 28 *Ground* waters from 26 sites near the Nile, EG. Sampling dates not recorded (Sultan et al., 2007).

**Project 00154:** 238 *Ground* water samples from 2011 sites in Manitoba, CA collected between 1984 and 2014 (Jasechko et al., 2017). These data not available for download from the wiDB, but may be available by contacting the data owner.

**Project 00162:** 984 *Cave\_drip* and *Precipitation* samples from 15 sites near Gunung Mulu National Park, MY collected between 2006 and 2012 (Moerman et al., 2014).

5 **Project 00169:** 537 *Cave\_drip*, *Soil*, and *Precipitation* samples from 1 site at Yangkao Cave, CN collected between 2011 and 2016 (Chen and Li, 2018).

**Project 00186:** 511 *Ground*, *Spring*, *Lake*, and *River\_or\_stream* samples at 474 sites in California, US collected between 1970 and 1995 (Williams and Rodoni, 1997).

10 **Project 00200:** 16 *Spring*, *Ground*, and *Lake* samples from 16 sites in the Galapagos Islands, EC, collected in 2007 (Warrier et al., 2012).

**Project 00202:** 92 *Ground*, *Stem*, and *Precipitation* from a single site in inner Mongolia collected between 2005 and 2006 (Yang et al., 2011).

**Project 00208:** 358 *Ground* samples from 358 sites near Melbourne, AU collected between 1900 and 1990 (Cartwright et al., 2012).

#### 15 **2.3.4 Tap and Bottled**

**Project 00046:** 1013 *Tap* water samples from 48 sites across the United States and Canada collected between 2005 and 2008 (Kennedy et al., 2011).

**Project 00058:** 801 *Tap* water samples from 172 sites across the Salt Lake Valley, UT collected between 2013 and 2015 (Jameel et al., 2016).

20 **Project 00065:** 750 *Tap*, *River\_or\_stream*, and *Ground* waters from 11 sites across the Salt Lake Valley collected between 2015 and 2017 (Jameel et al., 2018a).

**Project 00077:** 513 *Tap* samples from 507 sites across the United States collected between 2002 and 2003 (Bowen et al., 2007).

**Project 00104:** 780 *Tap* samples from 95 sites across China collected between 2014 and 2015 (Zhao et al., 2017).

25 **Project 00105:** 111 *Bottled*, *Tap*, *River\_or\_stream*, and *Lake* samples collected at 111 sites in western Europe, collected in 2005 (Bowen et al., 2017)

**Project 00114:** 720 *Tap* samples from 263 sites around San Francisco, CA, US collected between 2013 and 2015 (Tipple et al., 2017).

30 **Project 00146:** 91 *Bottled* samples from 74 sites from all around the world collected between 1995 and 2004 (Bowen et al., 2005).

**Project 00147:** 58 *Tap* samples from 58 sites across Mississippi, US, collected in 2014 (Warner et al., 2018).

**Project 00164:** 2099 *Tap* samples from 177 sites across China collected between 2014 and 2016 (Wang et al., 2018).

**Project 00201:** 38 *Tap* and *Spring* samples from 21 sites in Germany collected between 2016 and 2017 (Chen et al., 2017).



### 2.3.5 Ice and snow

**Project 00007:** 215 *Ice\_core* samples from Camp Century in northwest Greenland, representing 1761 to 1975 (Dansgaard et al., 1969).

5 **Project 00008 :** 629 *Ice\_core* samples from the Agassiz Ice Cap, Canada, representing 1349 through 1977 (Fisher et al., 1995).

**Project 00018:** 215 *Ice\_core* samples from GRIP/GISP2, Greenland, representing 1772 through 1986 (White et al., 1997).

**Project 00026:** 1885 *Ice\_core* samples from East Rongbuk Glacier, Mt. Everest, China, representing 1843 through 1997 (Shugui et al., 2003).

10 **Project 00047:** 252 *Ice\_core* samples from Mt. Logan, Yukon Territory, Canada, representing 1736 through 1987 (Moore et al., 2002).

**Project 00050:** 459 *Ice\_core* samples at 2Barrel and 70 *Ice\_core* samples at Galen in Greenland, representing 1989 through 2012 (Wong et al., 2013).

**Project 00068:** 36 *Ice\_core* samples from Taylor Dome, Antarctica, representing 1902 through 1983 (Steig et al., 2000).

**Project 00069:** 149 *Ice\_core* samples from Gomez Glacier, Antarctica, representing 1857 through 2005 (Thomas et al., 2009).

15 **Project 00070:** 547 *Ice\_core* samples from Dasuopu Glacier, China, representing 1450 through 1996 (Thompson et al., 2000).

**Project 00071:** 1010 *Ice\_core* samples from Quelccaya summit dome, Peru, representing 1000 through 2009 (Thompson et al., 2013).

**Project 00072:** 2399 *Ice\_core* samples from Huascaran, Peru, representing 1893 through 1993 (Thompson et al., 1995).

20 **Project 00083:** 464 *Ice\_core* samples from the Eclipse ice field, Alaska, US, representing 1895 through 1996 (Yalcin et al., 2007).

**Project 00091:** 302 *Snow\_pit* samples at 20 sites across Greenland, from the Greenland Inland Traverses of 2010 and 2011 (Wong et al., 2015).

### 2.3.6 Saline waters

25 **Project 00102:** 39 saline *Lake, Ground, Precipitation, River\_or\_stream* and *Snow\_pit* samples from 16 sites in the Aral Sea region (KZ, UZ) collected between 2004 and 2006 (Oberhänsli et al., 2009).

**Project 00118:** 31 saline *Lake* samples from the Great Salt Lake, UT in 2016 (Nielson and Bowen, 2010).

**Project 00141:** 393 *Ocean* samples at 93 sites in the Baltic Sea collected between 2010 and 2011 (Torniainen et al., 2017).

**Project 00148:** 23 *Ocean* samples collected at 16 sites near Manus, PG, in 2013 (Conroy et al., 2016).

30 **Project 00149:** 564 *Ocean* samples collected at 70 sites near 4 Pacific islands between 2012 and 2016 (Conroy et al., 2017).

**Project 00150** 191 *Ocean* samples collected at 66 sites from a transect in the western Pacific in 2012 (Conroy et al., 2014).

## 2.4 Unpublished data

These data were shared as a personal communication by the data owner. Though most data are available through the wiDB, some are embargoed upon the request of the data owner. These may be available from the data owner upon request.

### 2.4.1 Precipitation

- 5 **Project 00004:** 332 samples at 2 sites in eastern Canada collected between 1997 and 2010 (Grimes, 2013). These data are not available for download from the wiDB, but may be available upon request from the data contributor.

**Project 00038:** 141 samples at 1 site in Saskatoon, CA collected between 1990 and 2006 (Wassenaar, 2013).

**Project 00042:** 1250 samples at 1 site in Calgary, CN collected between 2003 and 2016 (Mayer, 2016).

**Project 00054:** 272 samples at 2 sites in Salt Lake City, UT, US collected between 2012 and 2019 (Bowen, 2019).

- 10 **Project 00061:** 86 samples at a site near Las Angeles, CA, US collected between 2006 and 2010 (Sessions, 2011).

**Project 00078:** 5641 *Precipitation, Vapor, River\_or\_stream, Tap, and Ground* water at 206 sites around Utah, US collected between 1988 and 2016 (Ehleringer, 2014).

**Project 00087:** 94 samples at 50 sites across eastern US, collected during a major storm in 2011 (Bowen, 2011).

**Project 00089:** 49 samples from West Lafayette, IN, US collected between 2009 and 2010 (Bowen, 2010).

- 15 **Project 00109:** 1373 samples from 8 sites in the Pacific Northwest, US collected between 2007 and 2017 (Csank, 2017). These data are not not available for download from the wiDB, but may be available upon request from the data contributor.

**Project 00133:** 270 samples from Utquigvik, AK, US and Chersky, RU collected between 2010 and 2016 (Feng, 2018). These data are not not available for download from the wiDB, but may be available upon request from the data contributor.

- 20 **Project 00152:** 993 samples at 18 sites across western Europe collected between 2014 and 2015 (Nelson, 2018). These data are not not available for download from the wiDB, but may be available upon request from the data contributor.

**Project 00196:** 652 samples at 2 sites near the Great Lakes, US collected between 2014 and 2018 (Thomas, 2018). These data are not not available for download from the wiDB, but may be available upon request from the data contributor.

### 2.4.2 Surface waters

- 25 **Project 00009:** 370 *River\_or\_stream, Precipitation, Spring, Tap, and Lake* samples from 270 sites in Central Asia collected between 2003 and 2008 (Hynek, 2013).

**Project 00021:** 75 *River\_or\_stream* samples from 40 sites in Utah, Wyoming, and Idaho, US collected between 2013 and 2014 (Jameel, 2013a).

**Project 00056:** 921 *River\_or\_stream* samples from 4 sites in Red Butte Creek, UT, US collected between 2012 and 2015 (Tulley-Cordova, 2014).

- 30 **Project 00064:** 484 assorted samples from 435 sites around the Salt Lake Valley, UT collected between 2013 and 2018 as part of the SPATIAL shortcourse (Bowen, 2018a).

**Project 00066:** 2026 *River\_or\_stream*, *Ground*, *Precipitation*, and *Spring* samples from 330 sites across the Navajo Nation collected between 2014 and 2017 (Tulley-Cordova, 2018).

**Project 00067:** 80 *River\_or\_stream*, *Ocean*, and *Lake* samples from 43 sites around Patagonia, CL and AR, collected in 2013 (Good, 2013).

5 **Project 00079:** 296 *River\_or\_stream* samples from 189 sites in central Indiana, US, collected in 2012 (Bowen, 2012).

**Project 00082:** 9 *Lake* samples at 9 sites around Wheatfields Lake, Navajo Nation, collected in 2013 (Tulley-Cordova, 2013).

**Project 00088:** 7 *Ground*, *River\_or\_stream*, and *Lake* samples from around Utah, US, collected in 2014 (Carricaburu, 2014).

**Project 00094:** 13 samples from 6 sites across Egypt, collected in 2008 (Cerling, 2017).

10 **Project 00095:** 204 *Ground*, *River\_or\_stream*, and *Precipitation* samples from Red Butte creek, UT collected between 2015 and 2016 (Brooks, 2017b).

**Project 00097:** 54 *River\_or\_stream* samples from 9 sites in central Indiana, US collected between 2006 and 2008 (Bowen, 2008).

**Project 00116:** 96 assorted samples from 66 sites across Iran collected between 2008 and 2010 (Mirzaie, 2018).

15 **Project 00144:** 19 *Ground*, *River\_or\_stream*, and *Lake* samples from across southern Ecuador, collected in 2018 as part of a learning abroad class (Johnson, 2018).

**Project 00183:** 75 *Tap*, *River\_or\_stream*, and *Lake* samples collected in 2018 from across the southeastern US (Beasley, 2018).

20 **Project 00184:** 107 *Lake*, *River\_or\_stream*, and *Precipitation* samples at 47 sites in Wyoming, US, collected in 2012 (Fiorella, 2012).

**Project 00195:** 12 *Lake* and *River\_or\_stream* samples at 12 sites in the Wind Rivers, WY, US, collected in 2018 (Fiorella, 2018).

**Project 00199:** 7 *River\_or\_stream* and *Spring* samples at 7 sites in Hop Valley, Zion National Park, UT, US, collected in 2018 (Stanczyk, 2018).

### 25 2.4.3 Tap and Bottled

**Project 00003:** 9 mostly *Tap* samples from 9 sites in Texas, US collected between 2014 and 2017 (Bowen, 2013).

**Project 00028:** 33 *Tap* and *Ground* samples at 21 sites across eastern India, collected in 2013 (Jameel, 2013b).

**Project 00044:** 89 *Tap* and *Bottled* samples at 63 sites in central and southern Mexico collected between 2013 and 2014 (Juarez, 2015).

30 **Project 00059:** 560 *Tap* samples from 195 sites in the Salt Lake Valley, UT, US collected between 2013 and 2017 (Bowen, 2017).

**Project 00098:** 276 *Lake*, *River\_or\_stream*, *Tap*, and *Ground* waters from 276 sites across the northwestern United States, collected in 2016 (Chesson, 2016).

**Project 00131:** 24 *Tap*, *River\_or\_stream*, *Spring* and *Ice\_core* samples from 24 sites across Iceland, collected in 2017 (Popp, 2018). These data are not not available for download from the wiDB, but may be available upon request from the data contributor.

**Project 00166:** 17 *Tap*, *Bottled*, *River\_or\_stream* samples from 13 sites in western Europe collected in 2018 (Bowen, 2018b).

- 5     **Project 00198:** 158 *Tap* and *Ground* samples from 158 sites across Mexico, collected in 2018 (Ammer, 2018). These data are not not available for download from the wiDB, but may be available upon request from the data contributor.

#### 2.4.4 Ice and snow

**Project 00002:** 32 *Ice\_core* samples near Greenland Ice Sheet summit, representing 1978 through 2009 (Osterberg and Kopec, Nov. 2015). These data are not not available for download from the wiDB, but may be available upon request from the data contributor.

10

**Project 00163:** 62 *Snow\_pit* samples from the Cottonwood Canyons, Utah, US, collected in 2018 (Putman, 2018).

## References

- ID Groundwater Quality Database (EDMS), <https://data-idwr.opendata.arcgis.com/pages/gis-data>, accessed Jan 2019, contributed by Amy Steimke.
- Hydrogeological characterization for the development of new water supply sources in priority areas in northern Chile, regions XV, I, II and III, Tech. Rep. S.I.T. no. 195, Dept. de Ingeniería Hidráulica y Ambiental, Pontificia Universidad Católica de Chile and Dirección General de Aguas, Santiago, Chile, accessed 2015-07-05, 2009.
- Abiye, T.: The use of Isotope Hydrology to characterize and assess Water Resources in south(ern) Africa Chapter: Rainfall and Groundwater Atlas, Tech. rep., wRC report K5/1907, 2013.
- Ammer, S.: Private Communication, 2018.
- 10 Anderson, L., Birks, J., Rover, J., and Guldager, N.: Controls on recent Alaskan lake changes identified from water isotopes and remote sensing, *Geophysical Research Letters*, 40, 3413–3418, <https://doi.org/10.1002/grl.50672>, 2013.
- Bai, Y., Fang, X., and Tian, Q.: Spatial patterns of soil n-alkane  $\delta D$  values on the Tibetan Plateau: Implications for monsoon boundaries and paleoelevation reconstructions, *Journal of Geophysical Research: Atmospheres*, 117, <https://doi.org/10.1029/2012JD017803>, 2012.
- Balagizi, C. M., Kasereka, M. M., Cuoco, E., and Liotta, M.: Influence of moisture source dynamics and weather patterns on stable isotopes ratios of precipitation in Central-Eastern Africa, *Science of The Total Environment*, 628-629, 1058–1078, <https://doi.org/https://doi.org/10.1016/j.scitotenv.2018.01.284>, 2018.
- 15 Bar-Matthews, M., Marean, C. W., Jacobs, Z., Karkanas, P., Fisher, E. C., Herries, A. I. R., Brown, K., Williams, H. M., Bernatchez, J., Ayalon, A., and Nilssen, P. J.: A high resolution and continuous isotopic speleothem record of paleoclimate and paleoenvironment from 90 to 53 ka from Pinnacle Point on the south coast of South Africa, *Quaternary Science Reviews*, 29, 2131–2145, <https://doi.org/https://doi.org/10.1016/j.quascirev.2010.05.009>, 2010.
- 20 Beasley, M.: Private Communication, 2018.
- Beekman, H. and amd K.J. de Vries, E. S.: Groundwater Recharge and Resources Assessment in the Botswana Kalahari, Tech. rep., Department Geological Survey, Lobatse, Botswana, executive summary GRES2, 1998.
- Benjamin, L., Knobel, L. L., Hall, L. F., Cecil, L. D., and Green, J. R.: Development of a local meteoric water line for southeastern Idaho, western Wyoming, and south-central Montana, Tech. rep., <https://doi.org/10.3133/sir20045126>, <http://pubs.er.usgs.gov/publication/sir20045126>, 2005.
- 25 Bershaw, J., Penny, S. M., and Garzione, C. N.: Stable isotopes of modern water across the Himalaya and eastern Tibetan Plateau: Implications for estimates of paleoelevation and paleoclimate, *Journal of Geophysical Research: Atmospheres*, 117, <https://doi.org/10.1029/2011JD016132>, <https://doi.org/10.1029/2011JD016132>, 2012.
- 30 Bowen, G., Kennedy, C., Henne, P., and Zhang, T.: Footprint of recycled water subsidies downwind of Lake Michigan, *Ecosphere*, 3, 53, <https://doi.org/10.1890/ES12-00062.1>, 2012.
- Bowen, G., J., Ehleringer, L., and Chesson: European water sample H and O isotope ratios, <https://doi.org/10.4211/hs.306433fab9740f0a3e5f91d248e3b40>, 2017.
- Bowen, G. J.: Private Communication, 2008.
- 35 Bowen, G. J.: Private Communication, 2010.
- Bowen, G. J.: Private Communication, 2011.
- Bowen, G. J.: Private Communication, 2012.

- Bowen, G. J.: Private Communication, 2013.
- Bowen, G. J.: Private Communication, 2017.
- Bowen, G. J.: Private Communication, 2018a.
- Bowen, G. J.: Private Communication, 2018b.
- 5 Bowen, G. J.: Private Communication, 2019.
- Bowen, G. J., Winter, D. A., Spero, H. J., Zierenberg, R. A., Reeder, M. D., Cerling, T. E., and Ehleringer, J. R.: Stable hydrogen and oxygen isotope ratios of bottled waters of the world, *Rapid Communications in Mass Spectrometry*, 19, 3442–3450, <https://doi.org/10.1002/rcm.2216>, 2005.
- Bowen, G. J., Ehleringer, J. R., Chesson, L. A., Stange, E., and Cerling, T. E.: Stable isotope ratios of tap water in the contiguous United States, *Water Resources Research*, 43, <https://doi.org/10.1029/2006WR005186>, 2007.
- 10 Braun, K., Bar-Matthews, M., Ayalon, A., Zilberman, T., and Matthews, A.: Rainfall isotopic variability at the intersection between winter and summer rainfall regimes in coastal South Africa (Mossel Bay, Western Cape Province), *South African Journal of Geology*, 120, 323–340, <https://doi.org/10.25131/gssajg.120.3.323>, 2017.
- Brooks, J. R.: National Rivers and Streams Assessment, 2008–2009, Private Communication, <https://www.epa.gov/national-aquatic-resource-surveys/data-national-aquatic-resource-surveys>, 2009.
- 15 Brooks, J. R.: National Rivers and Streams Assessment, 2013–2014, Private Communication, <https://www.epa.gov/national-aquatic-resource-surveys/data-national-aquatic-resource-surveys>, data will be released with NRSA release, 2014.
- Brooks, J. R.: Private Communication, 2017a.
- Brooks, J. R., Jr., P. J. W., Phillips, D. L., Comeleo, R., and Coulombe, R.: Willamette River Basin surface water isoscape ( $\delta^{18}O$  and  $\delta^2H$ ): temporal changes of source water within the river, *Ecosphere*, 3, art39, <https://doi.org/10.1890/ES11-00338.1>, 2012.
- 20 Brooks, J. R., Gibson, J. J., Birks, S. J., Weber, M. H., Rodecap, K. D., and Stoddard, J. L.: Stable isotope estimates of evaporation : inflow and water residence time for lakes across the United States as a tool for national lake water quality assessments, *Limnology and Oceanography*, 59, 2150–2165, <https://doi.org/10.4319/lo.2014.59.6.2150>, 2014.
- Brooks, J. R., Mushet, D. M., Vanderhoof, M. K., Leibowitz, S. G., Christensen, J. R., Neff, B. P., Rosenberry, D. O., Rugh, W. D., and Alexander, L. C.: Estimating Wetland Connectivity to Streams in the Prairie Pothole Region: An Isotopic and Remote Sensing Approach, *Water Resources Research*, 54, 955–977, <https://doi.org/10.1002/2017WR021016>, 2018.
- 25 Brooks, P.: Private Communication, 2017b.
- Carricaburu, J.: Private Communication, 2014.
- Cartwright, I., Weaver, T. R., Cendón, D. I., Fifield, L. K., Tweed, S. O., Petrides, B., and Swane, I.: Constraining groundwater flow, residence times, inter-aquifer mixing, and aquifer properties using environmental isotopes in the southeast Murray Basin, Australia, *Applied Geochemistry*, 27, 1698 – 1709, <https://doi.org/10.1016/j.apgeochem.2012.02.006>, 13th International Symposium on Water-Rock Interaction (WRI -13), 2012.
- 30 Cerling, T.: Private Communication, 2017.
- Chen, C.-J. and Li, T.-Y.: Geochemical characteristics of cave drip water respond to ENSO based on a 6-year monitoring work in Yangkou Cave, Southwest China, *Journal of Hydrology*, 561, 896–907, <https://doi.org/10.1016/j.jhydrol.2018.04.061>, 2018.
- 35 Chen, G., Schäufele, R., and Auerswald, K.: Ambient Conditions and Feeding Strategy Influence  $\delta^{18}O$  of Milk Water in Cows (*Bos taurus*), *Journal of Agricultural and Food Chemistry*, 65, 7387–7395, <https://doi.org/10.1021/acs.jafc.7b02482>, <https://doi.org/10.1021/acs.jafc.7b02482>, doi: 10.1021/acs.jafc.7b02482, 2017.

- Chesson, L.: Private Communication, 2016.
- Conroy, J. L., Cobb, K. M., Lynch-Stieglitz, J., and Polissar, P. J.: Constraints on the salinity–oxygen isotope relationship in the central tropical Pacific Ocean, *Marine Chemistry*, 161, 26–33, <https://doi.org/https://doi.org/10.1016/j.marchem.2014.02.001>, 2014.
- Conroy, J. L., Noone, D., Cobb, K. M., Moerman, J. W., and Konecky, B. L.: Paired stable isotopologues in precipitation and vapor: A case study of the amount effect within western tropical Pacific storms, *Journal of Geophysical Research: Atmospheres*, 121, 3290–3303, <https://doi.org/10.1002/2015JD023844>, 2016.
- Conroy, J. L., Thompson, D. M., Cobb, K. M., Noone, D., Rea, S., and Legrande, A. N.: Spatiotemporal variability in the  $\delta^{18}O$ -salinity relationship of seawater across the tropical Pacific Ocean, *Paleoceanography*, 32, 484–497, <https://doi.org/10.1002/2016PA003073>, 2017.
- Coplen, T. B. and Huang, R.: Stable hydrogen and oxygen isotope ratios for selected sites of the National Oceanic and Atmospheric Administration’s Atmospheric Integrated Research Monitoring Network (AIRMoN), Tech. rep., <https://doi.org/10.3133/ofr00279>, <http://pubs.er.usgs.gov/publication/ofr00279>, 2000.
- Coplen, T. B., Landwehr, J. M., Qi, H., and Lorenz, J.: The  $\delta^2H$  and  $\delta^{18}O$  of tap waters from 349 sites in the United States and selected territories, <https://pubs.usgs.gov/ds/703>, data Series 703.
- Criss, R. E.: Principles of stable isotope distribution, Oxford University Press on Demand, 1999.
- Csank, A.: Private Communication, 2017.
- Cui, J., Tian, L., Biggs, T. W., and Wen, R.: Deuterium-excess determination of evaporation to inflow ratios of an alpine lake: Implications for water balance and modeling, *Hydrological Processes*, 31, 1034–1046, <https://doi.org/10.1002/hyp.11085>, doi: 10.1002/hyp.11085; 26, 2017.
- Dansgaard, W., Johnsen, S. J., Møller, J., and Langway, C. C.: One Thousand Centuries of Climatic Record from Camp Century on the Greenland Ice Sheet, *Science*, 166, 377–380, <https://doi.org/10.1126/science.166.3903.377>, 1969.
- Deacon, J.R., L. C. T. P. W. M. B. N. C. C. G. R. and Woodside, M.: Tracking water-quality of the Nation’s rivers and streams, <http://cida.usgs.gov/quality/rivers>, doi:10.5066/F70G3H51, 2015.
- Ding, L., Xu, Q., Zhang, L., Yang, D., Lai, Q., Huang, F., and Shi, R.: Regional variation of river water oxygen isotope and empirical elevation prediction models in Tibetan Plateau, vol. 29, 2009.
- Douglas, T. A., Blum, J. D., Guo, L., Keller, K., and Gleason, J. D.: Hydrogeochemistry of seasonal flow regimes in the Chena River, a subarctic watershed draining discontinuous permafrost in interior Alaska (USA), *Chemical Geology*, 335, 48–62, <https://doi.org/https://doi.org/10.1016/j.chemgeo.2012.10.045>, 2013.
- Duffy, Christopher J., T. E. M.: CZO Dataset: Shale Hills - Stable Isotopes, Stream Water Chemistry (2008-2011), <http://criticalzone.org/national/data/dataset/2594/>, accessed 2017-06-15, 2011.
- Dutton, A. R.: Groundwater Isotopic Evidence for Paleorecharge in U.S. High Plains Aquifers, *Quaternary Research*, 43, 221–231, <https://doi.org/10.1006/qres.1995.1022>, 1995.
- E., V. B. T. B. M. L. M. V. W.: Environmental isotopes assist in groundwater sustainability assessment of the Taaibosch fault zone, Northern Province, South Africa, in: *Groundwater, Past achievements and Future challenges*, pp. 673–678, balkema, Rotterdam, 2000.
- Ehleringer, J.: Private Communication, 2014.
- Fackrell, J. K.: Geochemical evolution of Hawaiian groundwater, 2016.
- Feng, X.: Private Communication, 2018.
- Fiorella, R.: Private Communication, <https://dx.doi.org/10.5281/zenodo.1285261>, 2012.
- Fiorella, R.: Private Communication, 2018.

- Fiorella, R. P., Poulsen, C. J., Zolá, R. S. P., Barnes, J. B., Tabor, C. R., and Ehlers, T. A.: Spatiotemporal variability of modern precipitation  $\delta^{18}O$  in the central Andes and implications for paleoclimate and paleoaltimetry estimates, *Journal of Geophysical Research: Atmospheres*, 120, 4630–4656, <https://doi.org/10.1002/2014JD022893>, 2015.
- Fisher, D. A., Koerner, R. M., and Reeh, N.: Holocene climatic records from Agassiz Ice Cap, Ellesmere Island, NWT, Canada, *The Holocene*, 5, 19–24, <https://doi.org/10.1177/095968369500500103>, 1995.
- Florea, L., Bird, B., Lau, J. K., Wang, L., Lei, Y., Yao, T., and Thompson, L. G.: Stable isotopes of river water and groundwater along altitudinal gradients in the High Himalayas and the Eastern Nyainqentanghla Mountains, *Journal of Hydrology: Regional Studies*, 14, 37–48, <https://doi.org/https://doi.org/10.1016/j.ejrh.2017.10.003>, 2017.
- Follstad Shah, J., Jameel, Y., Smith, R., Gabor, R., Brooks, P., and Weintraub, S.: Spatiotemporal Variability in Water Sources Controls Chemical and Physical Properties of a Semi-arid Urban River System, *JAWRA Journal of the American Water Resources Association*, p. 1– 17, <https://doi.org/10.1111/1752-1688.12734>, 2019.
- Frew, R.: A stable Isotope rainfall map for the protection of NZ’s biological and environmental resources, <https://doi.org/10.13140/RG.2.1.2971.6967>, 2015.
- Friedman, I., Smith, G. I., Gleason, J. D., Warden, A., and Harris, J. M.: Stable isotope composition of waters in southeastern California 1. Modern precipitation, *Journal of Geophysical Research: Atmospheres*, 97, 5795–5812, <https://doi.org/10.1029/92JD00184>, 1992.
- Friedman, I., Harris, J. M., Smith, G. I., and Johnson, C. A.: Stable isotope composition of waters in the Great Basin, United States 1. Air-mass trajectories, *Journal of Geophysical Research: Atmospheres*, 107, ACL 14–1; ACL 14–14, <https://doi.org/10.1029/2001JD000565>, 2002a.
- Friedman, I., Smith, G. I., Johnson, C. A., and Moscati, R. J.: Stable isotope compositions of waters in the Great Basin, United States 2. Modern precipitation, *Journal of Geophysical Research: Atmospheres*, 107, ACL 15–1; ACL 15–22, <https://doi.org/10.1029/2001JD000566>, 2002b.
- Gammons, C. H., Poulson, S. R., Pellicori, D. A., Reed, P. J., Roesler, A. J., and Petrescu, E. M.: The hydrogen and oxygen isotopic composition of precipitation, evaporated mine water, and river water in Montana, USA, *Journal of Hydrology*, 328, 319–330, <https://doi.org/https://doi.org/10.1016/j.jhydrol.2005.12.005>, 2006.
- Gibson, J. J. and Edwards, T. W. D.: Regional water balance trends and evaporation-transpiration partitioning from a stable isotope survey of lakes in northern Canada, *Global Biogeochemical Cycles*, 16, 10–11; 10–14, <https://doi.org/10.1029/2001GB001839>, 2002.
- Giovanni, M. K., Horton, B. K., Garzione, C. N., McNulty, B., and Grove, M.: Extensional basin evolution in the Cordillera Blanca, Peru: Stratigraphic and isotopic records of detachment faulting and orogenic collapse in the Andean hinterland, *Tectonics*, 29, <https://doi.org/10.1029/2010TC002666>, 2010.
- Good, S. P.: Private Communication, 2013.
- Good, S. P., Mallia, D. V., Lin, J. C., and Bowen, G. J.: Stable Isotope Analysis of Precipitation Samples Obtained via Crowdsourcing Reveals the Spatiotemporal Evolution of Superstorm Sandy, *PloS one*, 9, e91 117, 2014.
- Grimes, V.: Private Communication, 2013.
- Guan, H., Zhang, X., Skrzypek, G., Sun, Z., and Xu, X.: Deuterium excess variations of rainfall events in a coastal area of South Australia and its relationship with synoptic weather systems and atmospheric moisture sources, *Journal of Geophysical Research: Atmospheres*, 118, 1123–1138, <https://doi.org/10.1002/jgrd.50137>, 2013.
- Hamilton, S.: Ambient groundwater geochemistry data for southern Ontario, 2007-2014, Ontario Geological Survey, Miscellaneous Release—Data, 283, 2015.



- Harris, C., Burgers, C., Miller, J., and Rawoot, F.: O- AND H-ISOTOPE RECORD OF CAPE TOWN RAINFALL FROM 1996 TO 2008, AND ITS APPLICATION TO RECHARGE STUDIES OF TABLE MOUNTAIN GROUNDWATER, SOUTH AFRICA, *South African Journal of Geology*, 113, 33–56, <https://doi.org/10.2113/gssajg.113.1.33>, 2010.
- Harvey, F. E.: Use of NADP Archive Samples to Determine the Isotope Composition of Precipitation: Characterizing the Meteoric Input Function for Use in Ground Water Studies, *Groundwater*, 39, 380–390, <https://doi.org/10.1111/j.1745-6584.2001.tb02322.x>, 2001.
- Harvey, F. E.: STABLE HYDROGEN AND OXYGEN ISOTOPE COMPOSITION OF PRECIPITATION IN NORTHEASTERN COLORADO, *JAWRA Journal of the American Water Resources Association*, 41, 447–460, <https://doi.org/10.1111/j.1752-1688.2005.tb03748.x>, 2005.
- Harvey, F. E. and Welker, J. M.: Stable isotopic composition of precipitation in the semi-arid north-central portion of the US Great Plains, *Journal of Hydrology*, 238, 90–109, [https://doi.org/https://doi.org/10.1016/S0022-1694\(00\)00316-4](https://doi.org/https://doi.org/10.1016/S0022-1694(00)00316-4), 2000.
- Henderson, A. K. and Shuman, B. N.: Hydrogen and oxygen isotopic compositions of lake water in the western United States Western U.S. lake-water isotopes, *GSA Bulletin*, 121, 1179–1189, <https://doi.org/10.1130/B26441.1>, 2009.
- Hoke, G. D., Aranibar, J. N., Viale, M., Araneo, D. C., and Llano, C.: Seasonal moisture sources and the isotopic composition of precipitation, rivers, and carbonates across the Andes at 32.5–35.5°S, *Geochemistry, Geophysics, Geosystems*, 14, 962–978, <https://doi.org/10.1002/ggge.20045>, 2013.
- Hoke, G. D., Liu-Zeng, J., Hren, M. T., Wissink, G. K., and Garzione, C. N.: Stable isotopes reveal high southeast Tibetan Plateau margin since the Paleogene, *Earth and Planetary Science Letters*, 394, 270–278, <https://doi.org/https://doi.org/10.1016/j.epsl.2014.03.007>, 2014.
- Hren, M. T., Bookhagen, B., Blisniuk, P. M., Booth, A. L., and Chamberlain, C. P.:  $\delta^{18}O$  and  $\delta D$  of streamwaters across the Himalaya and Tibetan Plateau: Implications for moisture sources and paleoelevation reconstructions, *Earth and Planetary Science Letters*, 288, 20 – 32, <https://doi.org/https://doi.org/10.1016/j.epsl.2009.08.041>, <http://www.sciencedirect.com/science/article/pii/S0012821X09005160>, 2009.
- Hughes, C. E. and Crawford, J.: Spatial and temporal variation in precipitation isotopes in the Sydney Basin, Australia, *Journal of Hydrology*, 489, 42–55, <https://doi.org/https://doi.org/10.1016/j.jhydrol.2013.02.036>, 2013.
- Hynek, S.: Private Communication, 2013.
- IAEA/WMO: Global Network of Isotopes in Precipitation: The GNIP Database, <https://www.iaea.org/services/networks/gnip>, 2019.
- Ingraham, N. L. and Taylor, B. E.: Light stable isotope systematics of large-scale hydrologic regimes in California and Nevada, *Water Resources Research*, 27, 77–90, <https://doi.org/10.1029/90WR01708>, 1991.
- Ingraham, N. L., Lyles, B. F., Jacobson, R. L., and Hess, J. W.: Stable isotopic study of precipitation and spring discharge in southern Nevada, *Journal of Hydrology*, 125, 243–258, [https://doi.org/https://doi.org/10.1016/0022-1694\(91\)90031-C](https://doi.org/https://doi.org/10.1016/0022-1694(91)90031-C), 1991.
- Iqbal, M. Z.: Short-term variability in isotopic composition of precipitation: A case study from the Midwestern United States, *Hydrological Processes*, 22, 4609–4619, <https://doi.org/10.1002/hyp.7066>, 2008.
- Jacob, H. and Sonntag, C.: An 8-year record of the seasonal variation of  $^2H$  and  $^{18}O$  in atmospheric water vapour and precipitation at Heidelberg, Germany, *Tellus B*, 43, 291–300, <https://doi.org/10.1034/j.1600-0889.1991.t01-2-00003.x>, 1991.
- Jameel, M. Y.: iUtah water survey, Personal communication.
- Jameel, M. Y.: Private Communication, 2013a.
- Jameel, M. Y.: Private Communication, 2013b.
- Jameel, Y., Brewer, S., Good, S. P., Tipple, B. J., Ehleringer, J. R., and Bowen, G. J.: Tap water isotope ratios reflect urban water system structure and dynamics across a semiarid metropolitan area, *Water Resources Research*, 52, 5891–5910, <https://doi.org/10.1002/2016WR019104>, 2016.

- Jameel, Y., Brewer, S., Fiorella, R. P., Tipple, B. J., Terry, S., and Bowen, G. J.: Isotopic reconnaissance of urban water supply system dynamics, *Hydrology and Earth System Sciences*, 22, 6109–6125, <https://doi.org/10.5194/hess-22-6109-2018>, <https://www.hydrol-earth-syst-sci.net/22/6109/2018/>, 2018a.
- Jameel, Y., Stein, S., Grimm, E., Roswell, C., Wilson, A. E., Troy, C., Höök, T. O., and Bowen, G. J.: Physico-chemical characteristics of a southern Lake Michigan river plume, *Journal of Great Lakes Research*, 44, 209 – 218, <https://doi.org/https://doi.org/10.1016/j.jglr.2018.01.003>, 2018b.
- Jasechko, S., Gibson, J., and Edwards, T.: Stable isotope mass balance of the Laurentian Great Lakes, vol. 40, <https://doi.org/10.1016/j.jglr.2014.02.020>, 2014.
- Jasechko, S., Wassenaar, L. I., and Mayer, B.: Isotopic evidence for widespread cold-season-biased groundwater recharge and young stream-flow across central Canada, *Hydrological Processes*, 31, 2196–2209, <https://doi.org/10.1002/hyp.11175>, 2017.
- Johnson, W. P.: Private Communication, 2018.
- Juarez, C.: Private Communication, 2015.
- Kebede, S., Travi, Y., and Rozanski, K.: The  $\delta^{18}O$  and  $\delta^2H$  enrichment of Ethiopian lakes, *Journal of Hydrology*, 365, 173–182, <https://doi.org/https://doi.org/10.1016/j.jhydrol.2008.11.027>, iD: 271842, 2009.
- Kennedy, C. D., Bowen, G. J., and Ehleringer, J. R.: Temporal variation of oxygen isotope ratios ( $\delta^{18}O$ ) in drinking water: Implications for specifying location of origin with human scalp hair, *Forensic Science International*, 208, 156–166, <https://doi.org/https://doi.org/10.1016/j.forsciint.2010.11.021>, 2011.
- Kopec, B. G., Feng, X., Posmentier, E. S., Chipman, J. W., and Virginia, R. A.: Use of principal component analysis to extract environmental information from lake water isotopic compositions, *Limnology and Oceanography*, 63, 1340–1354, <https://doi.org/10.1002/lno.10776>, 2018.
- Kopec, B. G., Feng, X., Posmentier, E. S., and Sonder, L. J.: Seasonal Deuterium Excess Variations of Precipitation at Summit, Greenland, and their Climatological Significance, *Journal of Geophysical Research: Atmospheres*, 124, 72–91, <https://doi.org/10.1029/2018JD028750>, 2019.
- Krabbenhof, D. P., Bowser, C. J., Anderson, M. P., and Valley, J. W.: Estimating groundwater exchange with lakes: 1. The stable isotope mass balance method, *Water Resources Research*, 26, 2445–2453, <https://doi.org/10.1029/WR026i010p02445>, 1990.
- Kurita, N. and Ichiyana, K.: Daily basis precipitation sampling network for water isotope analysis, <http://www.jamstec.go.jp/iorgc/hcorp/data/>, dataset accessed Aug 2017, 2008.
- Kurita, N., Yoshida, N., Inoue, G., and Chayanova, E. A.: Modern isotope climatology of Russia: A first assessment, *Journal of Geophysical Research: Atmospheres*, 109, <https://doi.org/10.1029/2003JD003404>, 2004.
- Lachniet, M. S., Lawson, D. E., Stephen, H., Sloat, A. R., and Patterson, W. P.: Isoscapes of  $\delta^{18}O$  and  $\delta^2H$  reveal climatic forcings on Alaska and Yukon precipitation, *Water Resources Research*, 52, 6575–6586, <https://doi.org/10.1002/2016WR019436>, <https://doi.org/10.1002/2016WR019436>, 2016.
- Levin, N. E., Zipser, E. J., and Cerling, T. E.: Isotopic composition of waters from Ethiopia and Kenya: Insights into moisture sources for eastern Africa, *Journal of Geophysical Research: Atmospheres*, 114, D23 306, <https://doi.org/10.1029/2009JD012166>, 2009.
- Li, L. and Garzione, C. N.: Spatial distribution and controlling factors of stable isotopes in meteoric waters on the Tibetan Plateau: Implications for paleoelevation reconstruction, *Earth and Planetary Science Letters*, 460, 302 – 314, <https://doi.org/https://doi.org/10.1016/j.epsl.2016.11.046>, 2017.

- Lisi, P. J., Schindler, D. E., Cline, T. J., Scheuerell, M. D., and Walsh, P. B.: Watershed geomorphology and snowmelt control stream thermal sensitivity to air temperature, *Geophysical Research Letters*, 42, 3380–3388, <https://doi.org/10.1002/2015GL064083>, 2015.
- Liu, Q.: Variations of river water stable isotopes on the Tibetan Plateau and adjacent regions, Master's thesis, Southwest University, Chongqing, 2014.
- 5 Liu, Q., Tian, L. D., Wang, J. L., Wen, R., Weng, Y. B., Shen, Y. P., Vladislav, M., and Kanaev, E.: A study of longitudinal and altitudinal variations in surface water stable isotopes in West Pamir, Tajikistan, *Atmospheric Research*, 153, 10–18, <https://doi.org/https://doi.org/10.1016/j.atmosres.2014.07.029>, 2015.
- Longinelli, A. and Selmo, E.: Isotopic composition of precipitation in Italy: a first overall map, *Journal of Hydrology*, 270, 75–88, [https://doi.org/https://doi.org/10.1016/S0022-1694\(02\)00281-0](https://doi.org/https://doi.org/10.1016/S0022-1694(02)00281-0), 2003.
- 10 Machavaram, M. V. and Krishnamurthy, R. V.: Earth surface evaporative process: A case study from the Great Lakes region of the United States based on deuterium excess in precipitation, vol. 59, [https://doi.org/10.1016/0016-7037\(95\)00256-Y](https://doi.org/10.1016/0016-7037(95)00256-Y), 1995.
- Martin, N. J., Conroy, J. L., Noone, D., Cobb, K. M., Konecky, B. L., and Rea, S.: Seasonal and ENSO Influences on the Stable Isotopic Composition of Galápagos Precipitation, *Journal of Geophysical Research: Atmospheres*, 123, 261–275, <https://doi.org/10.1002/2017JD027380>, <https://doi.org/10.1002/2017JD027380>, doi: 10.1002/2017JD027380; 25, 2018.
- 15 Masson-Delmotte, V., Hou, S., Ekaykin, A., Jouzel, J., Aristarain, A., Bernardo, R. T., Bromwich, D., Cattani, O., Delmotte, M., Falourd, S., Frezzotti, M., Gallée, H., Genoni, L., Isaksson, E., Landais, A., Helsen, M. M., Hoffmann, G., Lopez, J., Morgan, V., Motoyama, H., Noone, D., Oerter, H., Petit, J. R., Royer, A., Uemura, R., Schmidt, G. A., Schlosser, E., Simões, J. C., Steig, E. J., Stenni, B., Stievenard, M., van den Broeke, M. R., van de Wal, R. S. W., van de Berg, W. J., Vimeux, F., and White, J. W. C.: A Review of Antarctic Surface Snow Isotopic Composition: Observations, Atmospheric Circulation, and Isotopic Modeling, *Journal of Climate*, 21, 3359–3387, <https://doi.org/10.1175/2007JCLI2139.1>, 2008.
- 20 Mayer, B.: Private Communication, 2016.
- Meyer, R.; Talma, A. D. A. E. B. T. J. B. J. V. J. v. d. V. I.: Geohydrological investigation and evaluation of the Zululand Coastal Aquifer, Tech. rep., Water Research Commission, Pretoria,, report 221/1/01, 2001.
- Michelsen, N., Reshid, M., Siebert, C., Schulz, S., Knöller, K., Weise, S. M., Rausch, R., Al-Saud, M., and Schüth, C.: Isotopic and chemical composition of precipitation in Riyadh, Saudi Arabia, *Chemical Geology*, 413, 51–62, <https://doi.org/https://doi.org/10.1016/j.chemgeo.2015.08.001>, iD: 271727, 2015.
- 25 Mirzaie, M.: Private Communication, 2018.
- Moerman, J. W., Cobb, K. M., Adkins, J. F., Sodemann, H., Clark, B., and Tuen, A. A.: Diurnal to interannual rainfall  $\delta^{18}O$  variations in northern Borneo driven by regional hydrology, *Earth and Planetary Science Letters*, 369-370, 108–119, <https://doi.org/https://doi.org/10.1016/j.epsl.2013.03.014>, 2013.
- 30 Moerman, J. W., Cobb, K. M., Partin, J. W., Meckler, A. N., Carolin, S. A., Adkins, J. F., Lejau, S., Malang, J., Clark, B., and Tuen, A. A.: Transformation of ENSO-related rainwater to dripwater  $\delta^{18}O$  variability by vadose water mixing, *Geophysical Research Letters*, 41, 7907–7915, <https://doi.org/10.1002/2014GL061696>, 2014.
- Moore, G. W. K., Holdsworth, G., and Alverson, K.: Climate change in the North Pacific region over the past three centuries, *Nature*, 420, 401, <https://doi.org/10.1038/nature01229>, 2002.
- 35 Moreno, A., Sancho, C., Bartolomé, M., Oliva-Urcia, B., Delgado-Huertas, A., Estrela, M. J., Corell, D., López-Moreno, J. I., and Cacho, I.: Climate controls on rainfall isotopes and their effects on cave drip water and speleothem growth: the case of Molinos cave (Teruel, NE Spain), *Climate Dynamics*, 43, 221–241, <https://doi.org/10.1007/s00382-014-2140-6>, 2014.

- Nativ, R. and Riggio, R.: Precipitation in the southern High Plains: Meteorologic and isotopic features, *Journal of Geophysical Research: Atmospheres*, 95, 22 559–22 564, <https://doi.org/10.1029/JD095iD13p22559>, 1990.
- Nelson, D.: Private Communication, 2018.
- Nielson, K. E. and Bowen, G. J.: Hydrogen and oxygen in brine shrimp chitin reflect environmental water and dietary isotopic composition, *Geochimica et Cosmochimica Acta*, 74, 1812–1822, <https://doi.org/https://doi.org/10.1016/j.gca.2009.12.025>, 2010.
- Niemi, N. A. and Lechler, A. R.: The influence of snow sublimation on the isotopic composition of spring and surface waters in the southwestern United States: Implications for stable isotope-based paleoaltimetry and hydrologic studies, *GSA Bulletin*, 124, 318–334, <https://doi.org/10.1130/B30467.1>, 2012.
- Oberhänsli, H., Weise, S. M., and Stanichny, S.: Oxygen and hydrogen isotopic water characteristics of the Aral Sea, Central Asia, *Journal of Marine Systems*, 76, 310–321, <https://doi.org/https://doi.org/10.1016/j.jmarsys.2008.03.019>, iD: 271754, 2009.
- Oerter, E., Malone, M., Putman, A., Drits-Esser, D., Stark, L., and Bowen, G.: Every apple has a voice: using stable isotopes to teach about food sourcing and the water cycle, *Hydrology and Earth System Sciences*, 21, 3799–3810, <https://doi.org/10.5194/hess-21-3799-2017>, 2017.
- Ogrinc, N., Kocman, D., Miljević, N., Vreča, P., Vrzal, J., and Povinec, P.: Distribution of H and O stable isotopes in the surface waters of the Sava River, the major tributary of the Danube River, *Journal of Hydrology*, 565, 365–373, <https://doi.org/https://doi.org/10.1016/j.jhydrol.2018.08.024>, iD: 271842, 2018.
- Oshun, J., Dietrich, W. E., Dawson, T. E., and Fung, I.: Dynamic, structured heterogeneity of water isotopes inside hillslopes, *Water Resources Research*, 52, 164–189, <https://doi.org/10.1002/2015WR017485>, 2016.
- Osterberg, E. C. and Kopec, B. G.: Private Communication, Nov. 2015.
- Otte, I., Detsch, F., Gütlein, A., Scholl, M., Kiese, R., Appelhans, T., and Nauss, T.: Seasonality of stable isotope composition of atmospheric water input at the southern slopes of Mt. Kilimanjaro, Tanzania, *Hydrological Processes*, 31, 3932–3947, <https://doi.org/10.1002/hyp.11311>, 2017.
- Peng, H., Mayer, B., Harris, S., and Krouse, R. H.: A 10-yr record of stable isotope ratios of hydrogen and oxygen in precipitation at Calgary, Alberta, Canada, *Tellus B*, 56, 147–159, <https://doi.org/10.1111/j.1600-0889.2004.00094.x>, 2004.
- Peng, T.-R., Wang, C.-H., Huang, C.-C., Fei, L.-Y., Chen, C.-T. A., and Hwong, J.-L.: Stable isotopic characteristic of Taiwan’s precipitation: A case study of western Pacific monsoon region, *Earth and Planetary Science Letters*, 289, 357–366, <https://doi.org/http://dx.doi.org/10.1016/j.epsl.2009.11.024>, 2010.
- Popp, B.: Private Communication, 2018.
- Price, R. M., Swart, P. K., and Willoughby, H. E.: Seasonal and spatial variation in the stable isotopic composition ( $\delta^{18}\text{O}$  and  $\delta\text{D}$ ) of precipitation in south Florida, *Journal of Hydrology*, 358, 193–205, <https://doi.org/10.1016/j.jhydrol.2008.06.003>, 2008.
- Putman, A.: Private Communication, 2018.
- Putman, A. L., Feng, X., Sonder, L. J., and Posmentier, E. S.: Annual variation in event-scale precipitation  $\delta^2\text{H}$  at Barrow, AK, reflects vapor source region, *Atmospheric Chemistry and Physics*, 17, 4627–4639, <https://doi.org/10.5194/acp-17-4627-2017>, 2017.
- Rahul, P., Ghosh, P., and Bhattacharya, S. K.: Rainouts over the Arabian Sea and Western Ghats during moisture advection and recycling explain the isotopic composition of Bangalore summer rains, *Journal of Geophysical Research: Atmospheres*, 121, 6148–6163, <https://doi.org/10.1002/2015JD024579>, 2016.

- Rao, W., Zhang, W., Yong, B., Tan, H., Meredith, K. T., Jin, K., Zheng, F., and Wang, S.: Identifying the source of atmospheric moisture over arid deserts using stable isotopes ( $^2H$  and  $^{18}O$ ) in precipitation, *Hydrological Processes*, 32, 436–449, <https://doi.org/10.1002/hyp.11431>, 2018.
- Robertson, J. A. and Gazis, C. A.: An oxygen isotope study of seasonal trends in soil water fluxes at two sites along a climate gradient in Washington state (USA), *Journal of Hydrology*, 328, 375–387, <https://doi.org/https://doi.org/10.1016/j.jhydrol.2005.12.031>, iD: 271842, 2006.
- Rohrmann, A., Strecker, M. R., Bookhagen, B., Mulch, A., Sachse, D., Pingel, H., Alonso, R. N., Schildgen, T. F., and Montero, C.: Can stable isotopes ride out the storms? The role of convection for water isotopes in models, records, and paleoaltimetry studies in the central Andes, *Earth and Planetary Science Letters*, 407, 187–195, <https://doi.org/https://doi.org/10.1016/j.epsl.2014.09.021>, iD: 271830, 2014.
- 10 Salazar, C., Rojas, L., and Pollastri, A.: Assessment of water resources in the Pica sector, Pampa del Tamarugal basin, Tech. Rep. S.I.T. no. 48, Dirección General de Aguas and Comisión Chilena de Energía Nuclear, Santiago, Chile, accessed 2015-07-05, 1998.
- Sanchez-Murillo, R., Boll, J., Birkel, C., Hernandez, G. E., Aguirre-Duenas, E., Moya-Vega, P., and Gallardo-Amestica, M.: Isotopic Characterization of Waters Across Chile, pp. 203–225, <https://doi.org/10.1201/9781315155982-9>, 2017.
- Saylor, J. E., Mora, A., Horton, B. K., and Nie, J.: Controls on the isotopic composition of surface water and precipitation in the Northern Andes, Colombian Eastern Cordillera, *Geochimica et Cosmochimica Acta*, 73, 6999–7018, <https://doi.org/https://doi.org/10.1016/j.gca.2009.08.030>, iD: 271865, 2009.
- 15 Schmidt, G., Bigg, G. R., and Rohling, E. J.: Global Seawater Oxygen-18 Database - v1.22, <https://data.giss.nasa.gov/o18data/>, 1999.
- Scholl, M. A., Ingebritsen, S. E., Janik, C. J., and Kauahikaua, J. P.: Use of Precipitation and Groundwater Isotopes to Interpret Regional Hydrology on a Tropical Volcanic Island: Kilauea Volcano Area, Hawaii, *Water Resources Research*, 32, 3525–3537, <https://doi.org/10.1029/95WR02837>, doi: 10.1029/95WR02837; 19, 1996.
- 20 Scholl, M. A., Torres-Sanchez, A., and Rosario-Torres, M.: Stable Isotope ( $\delta^{18}O$  and  $\delta^2H$ ) Data for Precipitation, Stream Water, and Groundwater in Puerto Rico, Tech. rep., U.S. Geological Survey, <https://doi.org/https://dx.doi.org/10.3133/ofr20141101>, open-File Report 2014–1101, 2014.
- Sessions, A.: Private Communication, 2011.
- 25 Shugui, H., Dahe, Q., Dongqi, Z., Shichang, K., Mayewski, P. A., and Wake, C. P.: A 154a high-resolution ammonium record from the Rongbuk Glacier, north slope of Mt. Qomolangma (Everest), Tibet-Himal region, *Atmospheric Environment*, 37, 721–729, [https://doi.org/https://doi.org/10.1016/S1352-2310\(02\)00582-4](https://doi.org/https://doi.org/10.1016/S1352-2310(02)00582-4), iD: 271798, 2003.
- Simpkins, W. W.: Isotopic composition of precipitation in central Iowa, *Journal of Hydrology*, 172, 185–207, [https://doi.org/https://doi.org/10.1016/0022-1694\(95\)02694-K](https://doi.org/https://doi.org/10.1016/0022-1694(95)02694-K), 1995.
- 30 Smith, R. B. and Evans, J. P.: Orographic Precipitation and Water Vapor Fractionation over the Southern Andes, *Journal of Hydrometeorology*, 8, 3–19, <https://doi.org/10.1175/JHM555.1>, 2007.
- Stanczyk, A.: Private Communication, 2018.
- Steig, E. J., Morse, D. L., Waddington, E. D., Stuiver, M., Grootes, P. M., Mayewski, P. A., Twickler, M. S., and Whitlow, S. I.: Wisconsinan and Holocene Climate History from an Ice Core at Taylor Dome, Western Ross Embayment, Antarctica, *Geografiska Annaler: Series A, Physical Geography*, 82, 213–235, <https://doi.org/10.1111/j.0435-3676.2000.00122.x>, 2000.
- 35 Stern, L. A. and Blisniuk, P. M.: Stable isotope composition of precipitation across the southern Patagonian Andes, *Journal of Geophysical Research: Atmospheres*, 107, ACL 3–1; ACL 3–14, <https://doi.org/10.1029/2002JD002509>, 2002.

- Sultan, M., Yan, E., Sturchio, N., Wagdy, A., Gelil, K. A., Becker, R., Manocha, N., and Milewski, A.: Natural discharge: A key to sustainable utilization of fossil groundwater, *Journal of Hydrology*, 335, 25–36, <https://doi.org/https://doi.org/10.1016/j.jhydrol.2006.10.034>, iD: 271842, 2007.
- Survey, U. S. G.: Water quality samples for the nation, <https://nwis.waterdata.usgs.gov/nwis/>, 2019.
- 5 Thomas, E.: Private Communication, 2018.
- Thomas, E. R., Dennis, P. F., Bracegirdle, T. J., and Franzke, C.: Ice core evidence for significant 100-year regional warming on the Antarctic Peninsula, *Geophysical Research Letters*, 36, <https://doi.org/10.1029/2009GL040104>, 2009.
- Thompson, L. G., Mosley-Thompson, E., Davis, M. E., Lin, P. N., Henderson, K. A., Cole-Dai, J., Bolzan, J. F., and b Liu, K.: Late Glacial Stage and Holocene Tropical Ice Core Records from Huascarán, Peru, *Science*, 269, 46–50, <https://doi.org/10.1126/science.269.5220.46>,  
10 1995.
- Thompson, L. G., Yao, T., Mosley-Thompson, E., Davis, M. E., Henderson, K. A., and Lin, P. N.: A High-Resolution Millennial Record of the South Asian Monsoon from Himalayan Ice Cores, *Science*, 289, 1916–1919, <https://doi.org/10.1126/science.289.5486.1916>, 2000.
- Thompson, L. G., Mosley-Thompson, E., Davis, M. E., Zagorodnov, V. S., Howat, I. M., Mikhlenko, V. N., and Lin, P. N.: Annually Resolved Ice Core Records of Tropical Climate Variability over the Past ~1800 Years, *Science*, 340, 945–950,  
15 <https://doi.org/10.1126/science.1234210>, 2013.
- Tian, C. and Wang, L.: Stable isotope variations of daily precipitation from 2014–2018 in the central United States, *Scientific data*, 6, 190 018, <https://doi.org/https://doi.org/10.1038/sdata.2019.18>, 2019.
- Tian, L., Liu, Z., Gong, T., Yin, C., Yu, W., and Yao, T.: Isotopic variation in the lake water balance at the Yamdruk-tso basin, southern Tibetan Plateau, *Hydrological Processes*, 22, 3386–3392, <https://doi.org/10.1002/hyp.6919>, 2008.
- 20 Tipple, B. J.: Isotope analyses of hair as a trace evidence tool to reconstruct human movements: combining strontium isotope with hydrogen/oxygen isotope data, Tech. rep., Department of Justice, National Criminal Justice Reference Service, document Number 248977, 2015.
- Tipple, B. J., Jameel, Y., Chau, T. H., Mancuso, C. J., Bowen, G. J., Dufour, A., Chesson, L. A., and Ehleringer, J. R.: Stable hydrogen and oxygen isotopes of tap water reveal structure of the San Francisco Bay Area’s water system and adjustments during a major drought,  
25 *Water Research*, 119, 212–224, <https://doi.org/https://doi.org/10.1016/j.watres.2017.04.022>, 2017.
- Tornaiainen, J., Lensu, A., Vuorinen, P. J., Sonninen, E., Keinänen, M., Jones, R. I., Patterson, W. P., and Kiljunen, M.: Oxygen and carbon isoscapes for the Baltic Sea: Testing their applicability in fish migration studies, *Ecology and Evolution*, 7, 2255–2267, <https://doi.org/10.1002/ece3.2841>, 2017.
- Tulley-Cordova, C.: Private Communication, 2013.
- 30 Tulley-Cordova, C.: Private Communication, 2014.
- Tulley-Cordova, C.: Private Communication, 2018.
- Uribe, J., Muñoz, J. F., Gironás, J., Oyarzun, R., Aguirre, E., and Aravena, R.: Assessing groundwater recharge in an Andean closed basin using isotopic characterization and a rainfall-runoff model: Salar del Huasco basin, Chile, *Hydrogeology Journal*, 23, 1535–1551, <https://doi.org/10.1007/s10040-015-1300-z>, 2015.
- 35 Vogel, J. and van Urk, H.: Isotopic investigation of Lake St Lucia, Tech. rep., CSIR, unpublished CSIR report, 1975.
- Wang, C.-H. and Peng, T. R.: Hydrogen and oxygen isotopic compositions of Taipei precipitation: 1990-1998, vol. 1, 2001.

- Wang, S., Zhang, M., Bowen, G. J., Liu, X., Du, M., Chen, F., Qiu, X., Wang, L., Che, Y., and Zhao, G.: Water Source Signatures in the Spatial and Seasonal Isotope Variation of Chinese Tap Waters, *Water Resources Research*, 54, 9131–9143, <https://doi.org/10.1029/2018WR023091>, 2018.
- Warner, M. M., Plemons, A. M., Herrmann, N. P., and Regan, L. A.: Refining Stable Oxygen and Hydrogen Isoscapes for the Identification of Human Remains in Mississippi, *Journal of forensic sciences*, 63, 395–402, <https://doi.org/10.1111/1556-4029.13575>, 2018.
- Warrier, R. B., Castro, M. C., and Hall, C. M.: Recharge and source-water insights from the Galapagos Islands using noble gases and stable isotopes, *Water Resources Research*, 48, <https://doi.org/10.1029/2011WR010954>, 2012.
- Wassenaar, L.: Private Communication, 2013.
- Wassenaar, L. I., Wilgenburg, S. L. V., Larson, K., and Hobson, K. A.: A groundwater isoscape ( $\delta D$ ,  $\delta^{18}O$ ) for Mexico, *Journal of Geochemical Exploration*, 102, 123–136, <https://doi.org/10.1016/j.gexplo.2009.01.001>, 2009.
- Welker, J.: Isotopic ( $\delta^{18}O$ ) characteristics of weekly precipitation collected across the USA: an initial analysis with application to water source studies, *Hydrological Processes*, 14, 1449–1464, [https://doi.org/10.1002/1099-1085\(20000615\)14:8<1449::AID-HYP993>3.0.CO;2-7](https://doi.org/10.1002/1099-1085(20000615)14:8<1449::AID-HYP993>3.0.CO;2-7), 2000.
- Wen, R., Tian, L., Liu, F., and Qu, D.: Lake Water Isotope Variation Linked with the In-Lake Water Cycle of the Alpine Bangong Co, Arid Western Tibetan Plateau, Arctic, Antarctic, and Alpine Research, 48, 563–580, <https://doi.org/10.1657/AAAR0015-028>, doi: 10.1657/AAAR0015-028, 2016.
- West, A. G., February, E. C., and Bowen, G. J.: Spatial analysis of hydrogen and oxygen stable isotopes (“isoscapes”) in ground water and tap water across South Africa, *Journal of Geochemical Exploration*, 145, 213–222, <https://doi.org/10.1016/j.gexplo.2014.06.009>, iD: 271841, 2014.
- White, J. W. C., Barlow, L. K., Fisher, D., Grootes, P., Jouzel, J., Johnsen, S. J., Stuiver, M., and Clausen, H.: The climate signal in the stable isotopes of snow from Summit, Greenland: Results of comparisons with modern climate observations, *Journal of Geophysical Research: Oceans*, 102, 26 425–26 439, <https://doi.org/10.1029/97JC00162>, 1997.
- Williams, A. E. and Rodoni, D. P.: Regional isotope effects and application to hydrologic investigations in southwestern California, *Water Resources Research*, 33, 1721–1729, <https://doi.org/10.1029/97WR01035>, 1997.
- Wong, G. J., Hawley, R. L., Lutz, E. R., and Osterberg, E. C.: Trace-element and physical response to melt percolation in Summit (Greenland) snow, *Annals of Glaciology*, 54, 52–62, <https://doi.org/10.3189/2013AoG63A602>, 2013.
- Wong, G. J., Osterberg, E. C., Hawley, R. L., Courville, Z. R., Ferris, D. G., and Howley, J. A.: Coast-to-interior gradient in recent northwest Greenland precipitation trends (1952–2012), *Environmental Research Letters*, 10, 114 008, <https://doi.org/10.1088/1748-9326/10/11/114008>, 2015.
- Xie, L., Wei, G., Deng, W., and Zhao, X.: Daily  $\delta^{18}O$  and  $\delta D$  of precipitations from 2007 to 2009 in Guangzhou, South China: Implications for changes of moisture sources, *Journal of Hydrology*, 400, 477–489, <https://doi.org/10.1016/j.jhydrol.2011.02.002>, iD: 271842, 2011.
- Xu, Q., Hoke, G. D., Liu-Zeng, J., Ding, L., Wang, W., and Yang, Y.: Stable isotopes of surface water across the Longmenshan margin of the eastern Tibetan Plateau, *Geochemistry, Geophysics, Geosystems*, 15, 3416–3429, <https://doi.org/10.1002/2014GC005252>, doi: 10.1002/2014GC005252; 15, 2014.
- Yalcin, K., Wake, C. P., Kreutz, K. J., Germani, M. S., and Whitlow, S. I.: Ice core paleovolcanic records from the St. Elias Mountains, Yukon, Canada, *Journal of Geophysical Research: Atmospheres*, 112, <https://doi.org/10.1029/2006JD007497>, 2007.

- Yamanaka, T., Tsujimura, M., Oyunbaatar, D., and Davaa, G.: Isotopic variation of precipitation over eastern Mongolia and its implication for the atmospheric water cycle, *Journal of Hydrology*, 333, 21–34, <https://doi.org/https://doi.org/10.1016/j.jhydrol.2006.07.022>, iD: 271842, 2007.
- Yamanaka, T., Makino, Y., Wakiyama, Y., Kishi, K., Maruyama, K., Kano, M., Ma, W., and Suzuki, K.: How reliable are modeled precipitation isoscapes over a high-relief mountainous region?, *Hydrological Research Letters*, 9, 118–124, <https://doi.org/10.3178/hrl.9.118>, tI:, 2015.
- Yang, H., Auerswald, K., Bai, Y., and Han, X.: Complementarity in water sources among dominant species in typical steppe ecosystems of Inner Mongolia, China, *Plant and Soil*, 340, 303–313, <https://doi.org/10.1007/s11104-010-0307-4>, iD: Yang2011, 2011.
- Yao, T., Masson-Delmotte, V., Gao, J., Yu, W., Yang, X., Risi, C., Sturm, C., Werner, M., Zhao, H., He, Y., Ren, W., Tian, L., Shi, C., and Hou, S.: A review of climatic controls on  $\delta^{18}O$  in precipitation over the Tibetan Plateau: Observations and simulations, *Reviews of Geophysics*, 51, 525–548, <https://doi.org/10.1002/rog.20023>, 2013.
- Yapp, C. J.: D/H variations of meteoric waters in Albuquerque, New Mexico, U.S.A., *Journal of Hydrology*, 76, 63–84, [https://doi.org/https://doi.org/10.1016/0022-1694\(85\)90090-3](https://doi.org/https://doi.org/10.1016/0022-1694(85)90090-3), iD: 271842, 1985.
- Yi, Y., Brock, B. E., Falcone, M. D., Wolfe, B. B., and Edwards, T. W. D.: A coupled isotope tracer method to characterize input water to lakes, *Journal of Hydrology*, 350, 1–13, <https://doi.org/https://doi.org/10.1016/j.jhydrol.2007.11.008>, iD: 271842, 2008.
- Zhao, S., Hu, H., Tian, F., Tie, Q., Wang, L., Liu, Y., and Shi, C.: Divergence of stable isotopes in tap water across China, *Scientific Reports*, 7, 43 653, <https://doi.org/10.1038/srep43653>, 2017.
- Zhu, L., Fan, M., Hough, B., and Li, L.: Spatiotemporal distribution of river water stable isotope compositions and variability of lapse rate in the central Rocky Mountains: Controlling factors and implications for paleoelevation reconstruction, *Earth and Planetary Science Letters*, 496, 215–226, <https://doi.org/https://doi.org/10.1016/j.epsl.2018.05.047>, iD: 271830, 2018.
