# Supplementary material for: Technical note: A global database of the stable isotopic ratios of meteoric and terrestrial waters
Source: Copernicus journal article supplement (doi:10.5194/hess-2019-173), 2019-04-26
Supplement: Supplementary file 1 [file WI_Template.xlsx]

## Sheet: Sites
Site_ID	Site_Name	Latitude	Longitude	Elevation_mabsl	Address	City	State_or_Province	Country	Site_Comments

## Sheet: Samples
Sample_ID	Sample_ID_2	Site_ID	Type	Start_Date	Start_Time_Zone	Collection_Date	Collection_Time_Zone	Sample_Volume_ml	Collector_type	Phase	Depth_meters	Sample_Source	Sample_Ignore	Sample_Comments	Project_ID

## Sheet: Water_Isotope_Data
WI_Analysis_ID	Sample_ID	d2H	d18O	D17O	d2H_Analytical_SD	d18O_Analytical_SD	D17O_Analytical_SD	WI_Analysis_Date	WI_Analysis_Source	WI_Analysis_Instrument	WI_Analysis_Ignore	WI_Analysis_Comments

## Sheet: Climate_Data
Climate_ID	Sample_ID	Precipitation_mm	Mean_Temperature_C	Min_Temperature_C	Max_Temperature_C	Vapor_Pressure_hPa	Climate_Source	Climate_Comments

## Sheet: Projects
Project_ID	Contact_Name	Contact_Email	Citation	URL	Project_Name	Proprietary

## Sheet: TableHeaderDescriptions
Sites	Description	Example	Required
Site_ID	A unique identifier for the site	BCC_001	Yes
Site_Name	A general name for the site	Brighton stream	No
Latitude	Latitude in decimal degrees, S is negative	45.112	Yes
Longitude	Longitude in decimal degrees, W is negative	-111.23	Yes
Elevation_mabsl	Elevation above sea level in meters	1200	No
Address	Address of collection location		No
City	City of collection	Salt Lake City	No
State_or_Province	State, two letter code	UT (not Utah)	No
Country	Country two letter code	US (not USA, or United States)	Yes
Site_Comments	Comments about site	Site is right next to a big stump	No
Samples	Description	Example	Required
Sample_ID	A unique idenfier for the sample	BCC_SW_001	Yes
Sample_ID_2	Descriptor, assigned by us at SPATIAL	Big Cottonwood stream	No
Site_ID	Matches Site_ID in Sites exactly	BCC_001	Yes
Type	Sample type • Bottled • Canal • Cave_drip • Cloud_or_fog • Ground • Ice_core • Lake • Leaf • Mine • Ocean • Precipitation • River_or_stream • Snow_pit • Soil • Spring • Sprinkler • Stem • Tap • Vapor	Precipitation	Yes
Start_Date	Start datetime for collection of time-integrated sample, in local time, time in 24hr format	yyyy-mm-dd hh:mm	No
Start_Time_Zone	Timezone of collection, relative to UTC	8	No
Collection_Date	Datetime of sample collection in local time, time in 24hr format	yyyy-mm-dd hh:mm	Yes
Collection_Time_Zone	Timezone of sample collection, relative to UTC	8	No
Sample_Volume_ml	Sample volume in mL. Most useful for precipitation	3.3	No
Collector_type	Description of collector type	Funnel, dip	No
Phase	What phase the water was in (vapor, liquid, solid)	Liquid	No
Depth_meters	The depth of sampling, levels above ground entered as negative numbers	0	No
Sample_Source	Source of sample, whoever was responsible for sample collection	Annie Putman	No
Sample_Ignore	Whether the sample should be ignored because it may be compromised (1) or can be trusted (0).	0	Yes
Sample_Comments	Specific notes about sample		No
Project_ID	A unique idenfier assigned by us at SPATIAL to link to project table	00103	No
Water_Isotope_Data	Description	Example	Required
WI_Analysis_ID	a unique identifier for the water isotope analysis instance	BCC_SW_001-01	Yes
Sample_ID	Matches sample ID in samples column	BCC_SW_001	Yes
d2H	hydrogen isotope value calibrated on VSMOW-SLAP scale in permil	-65.1	No
d18O	oxygen isotope value calibrated on VSMOW_SLAP scale, reported in permille	-0.5	No
D17O	oxygen 17 isotope value in per mil		No
d2H_Analytical_SD	analytical standard deviation (from instrument)	0.2	No
d18O_Analytical_SD	analytical standard deviation (from instrument)	0.01	No
D17O_Analytical_SD	analytical standard deviation (from instrument)		No
WI_Analysis_Date	Date when water isotopes were analyzed	2006-02-15	No
WI_Analysis_Source	Which lab ran the analysis	SPATIAL	No
WI_Analysis_Instrument	What instrument the analysis was performed on	Picarro i2130	No
WI_Analysis_Ignore	Whether the isotope measurement is trusted (0) or suspect (1)	0	Yes
WI_Analysis_Comments	Any comment about the analysis		No
Climate_Data	Description	Example	Required
Climate_ID	Unique identifier	BCC_SW_001-Clim	Yes
Sample_ID	Matches Sample_ID in Samples Table	BCC_SW_001	Yes
Precipitation_mm	millimeters of precipitation	3.1	No
Mean_Temperature_C	mean temperature during sampling in celsius	15.3	No
Min_Temperature_C	minimum temperature during sampling in celsius	13.1	No
Max_Temperature_C	maximum temperature during sampling in celsius	16.6	No
Vapor_Pressure_hPa	Vapor pressure in hPa		No
Climate_Source	Source of climate information	Alta Collins Met station	No
Climate_Comments	Comments about climate observations	higher elevation and one canyon south	No
Projects	Description	Example	Required
Project_ID	Unique project identifier assigned by us at SPATIAL, matches Project_ID in samples	00103	No
Contact_Name	Contact name for dataset	Annie Putman	Yes
Contact_Email	Contact email for dataset	xxxxxx@utah.edu	Yes
Citation	However the dataset should be cited. Can be personal communication, but is usually a paper	personal communication	Yes
URL	can be the DOI, or URL where original dataset may be accessed		No
Project_Name	The name of the project	Cottonwood canyon water samples	Yes
Proprietary	Whether the data can be accessed by the public (0) or should be kept private (1)	0	Yes
